# Supplementary material for: Broad-band self-injection organic laser amplifier based on a DBR microcavity
Source: Royal Society of Chemistry journal article supplement (doi:10.1039/d3tc02896h), 2023-01-01
Supplement: d3tc02896h1.pdf [file d3tc02896h1.pdf]

# Broad-band self-injection organic laser amplifier based on a DBR microcavity

Tianqi Zhang, Wenwen Wu, Yue Liu, and Xinping Zhang\*

Institute of Information Photonics Technology, Beijing University of  
Technology, Beijing 100124, P. R. China

\*Email: [zhangxinping@bjut.edu.cn](mailto:zhangxinping@bjut.edu.cn)

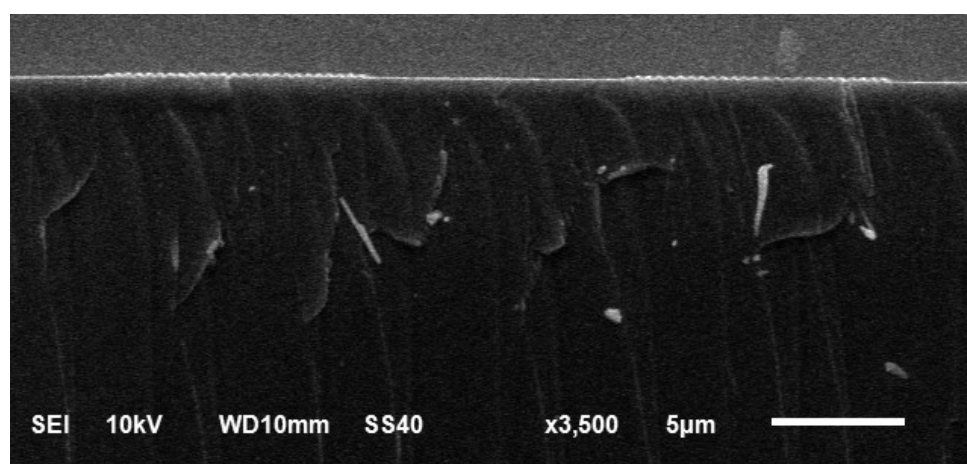

Fig. S1 The SEM image of the DBR microcavities fabricated into the silica substrate using interference lithography and reaction ion beam etching.

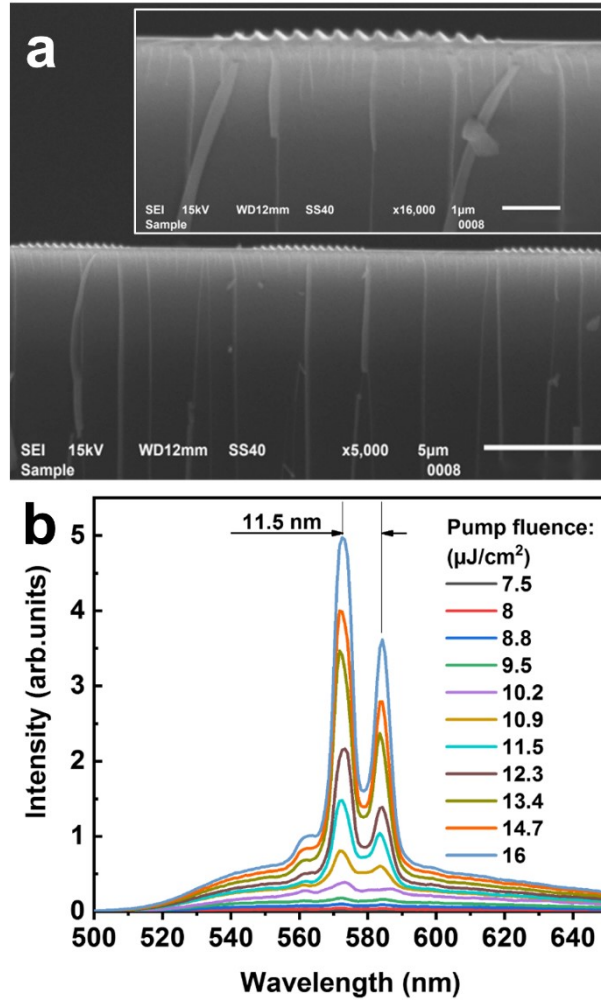

Fig. S2 (a) The SEM image of the DBR microcavities with a period of 10  $\mu\text{m}$  for the large-period grating. (b) Lasing spectra of the DBR microcavity laser array with a period of 10  $\mu\text{m}$  at varied pump fluence from 7.5 to 16  $\mu\text{J}/\text{cm}^2$ .

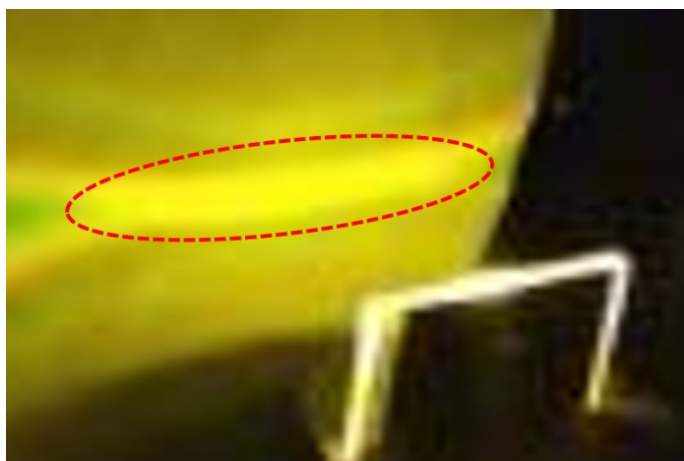

Fig. S3 A enlarged view to demonstrate the high-contrast output laser beam of the DBR microcavity laser amplifier.
